# Supplementary material for: Mesenchymal Stem/Stromal Cells in Three-Dimensional Cell Culture: Ion Homeostasis and Ouabain-Induced Apoptosis
Source: MDPI journal article supplement (doi:10.3390/biomedicines11020301), 2023-01-21
Supplement: s1 [file s1]

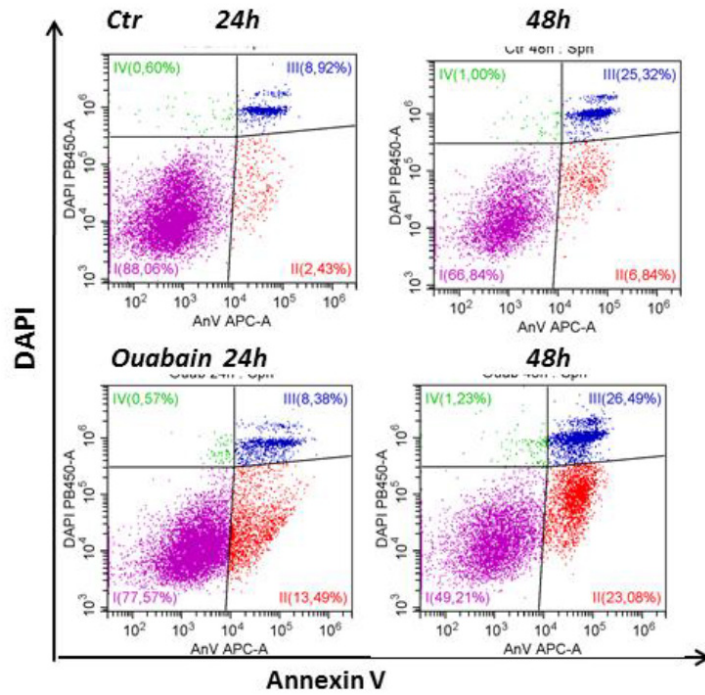

**Figure S1.** Apoptosis assay of eMSCs spheroids obtained using a hanging drop, thereafter transferred to dishes coated with 2-hydroxyethyl methacrylate (HEMA, Sigma) and cultured in 2 ml of complete growth medium with ouabain for the next 24 or 48 h. AnV-/DAPI- live cells (I); early apoptotic AnV+/DAPI- cells (II); late apoptotic cells AnV+/DAPI+ (III). DAPI+AnV- necrotic cells (IV).
